# Supplementary material for: Structural Analysis of the Complex between Penta-EF-Hand ALG-2 Protein and Sec31A Peptide Reveals a Novel Target Recognition Mechanism of ALG-2
Source: MDPI journal article supplement (doi:10.3390/ijms16023677), 2015-02-06
Supplement: s1 [file s1]

## Supplementary Information

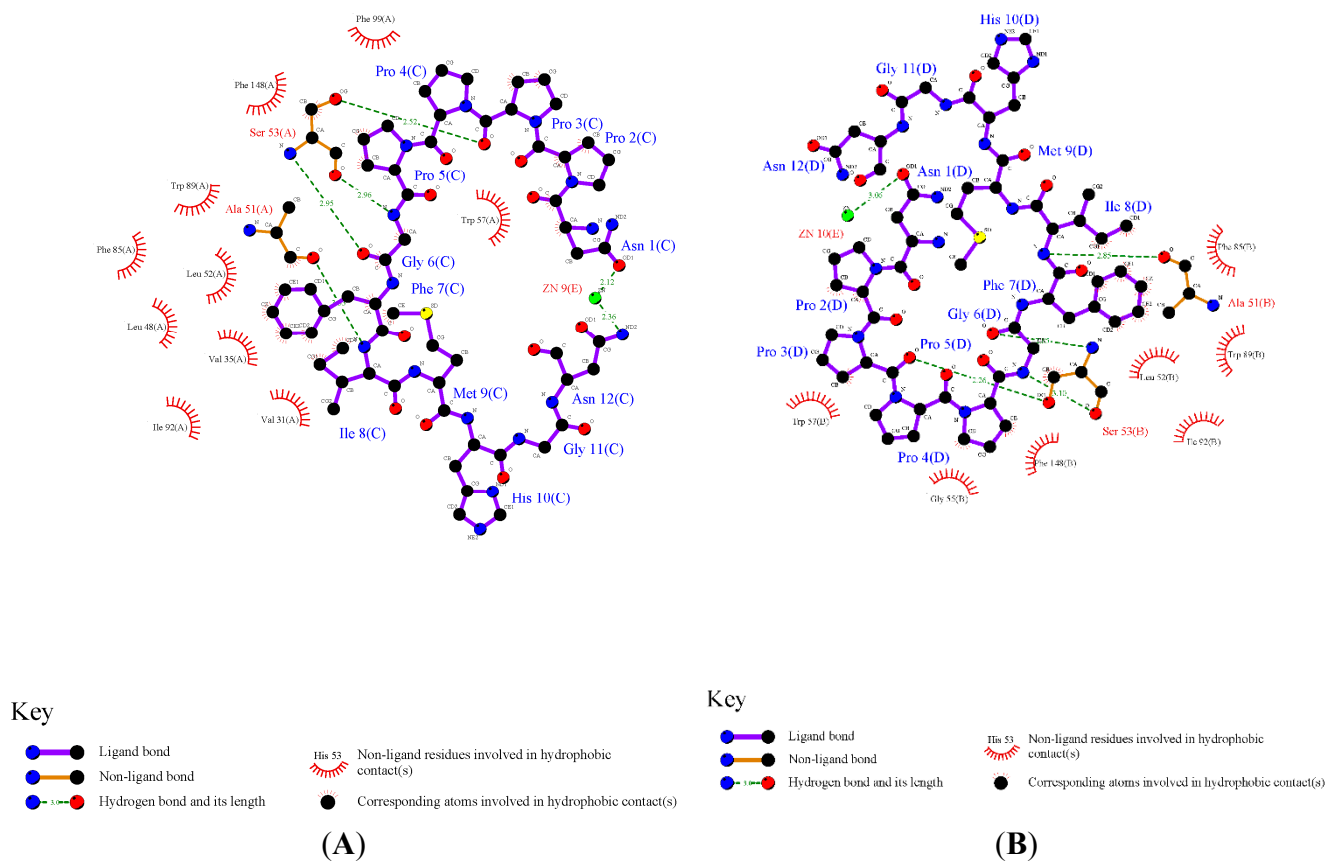

**Figure S1.** Diagrams of protein-ligand contacts. The LIGPLOT program was used for automatic generation of 2D ligand-protein interaction diagrams of chain A/chain C (**A**) and chain B/chain D (**B**).

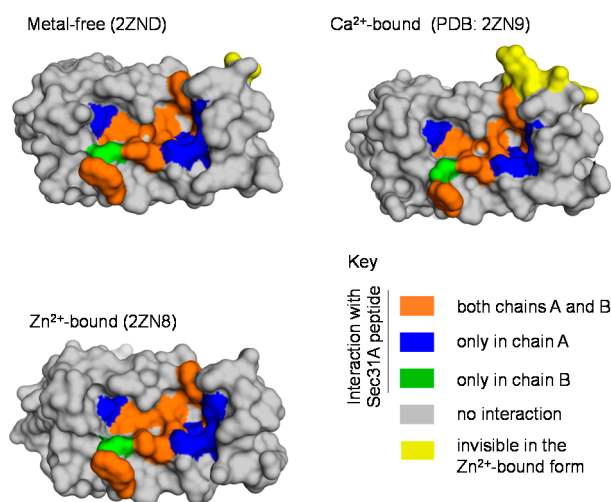

**Figure S2.** Surface presentations of Pocket 3 areas. Previously resolved structures of ALG-2 in a metal-free form (PDB: 2ZND), a Ca<sup>2+</sup>-bound form (PDB: 2ZN9, chain A) and a Zn<sup>2+</sup>-bound form (PDB: 2ZN8) are compared. Residues that are in contact with the Sec31A peptide in the complex structure (PDB: 3WXA) are colored as indicated. Differences in the N-terminal residues visible in 2ZND (<sup>25</sup>Q) and 2ZN9 (<sup>21</sup>ALPDQ<sup>25</sup>), but not in 2ZN8, are colored in yellow.

|    |      | ABM-2 |      |         |     |      |        |           |          |     |   |      |  |
|----|------|-------|------|---------|-----|------|--------|-----------|----------|-----|---|------|--|
| Hs | 827  | -QTQ  | QYY  | PHGEN   | --  | PPPP | GGF    | IMHGNVNP  | PNAAGQ   | -   |   | 856  |  |
| Mm | 826  | -QTQ  | QYY  | PHGEN   | --  | PPPP | GGF    | IMQGNVIP  | NPNAAP   | -   |   | 855  |  |
| Gg | 833  | -SAQ  | QYY  | QGGDK   | --  | PPPP | GGF    | IMPGAINPS | APPQ     | -   |   | 862  |  |
| Pb | 826  | -PTP  | QYY  | QORDN   | -   | PPPP | GGF    | IMQKDMNP  | PHMPPH   | -   |   | 856  |  |
| Xt | 823  | -ISEL | PLL  | QRNS    | --  | ALPL | GFNIP  | PGSTYTSG  | SLA      | -   |   | 852  |  |
| Dr | 871  | -LVP  | SSDP | QGD     | S-- | TPPA | FGLQSP | AMASVP    | PAS      | -   |   | 899  |  |
| Dm | 816  | -PPN  | QYA  | QPSWPAQ | V   | PP   | LQTSYP | GAQQPQ    | APPQ     | -   |   | 847  |  |
| Ce | 791  | -QPTR | TYQ  | QPAP    | --  | IPPP | NLV    | NG        | FNPYNPSH | -   |   | 818  |  |
| Sc | 1073 | -TTQ  | --   | PNGSS   | --  | YPPT | G      | PYTNNH    | TMTSP    | PPV | - | 1099 |  |

**Figure S3.** Alignment of amino acid sequences of Sec31 in the ALG-2-binding motif type 2 (ABM-2) regions. Amino acid sequences of human Sec31A and its orthologous sequences from different organisms were retrieved from UniProt or NCBI and aligned as described in the Experimental Section. Conserved residues in five or more sequences are highlighted in cyan. The ABM-2 sequence is indicated by a red bar. Hs, *Homo sapiens* (human; UniProt, O94979); Mm, *Mus musculus* (mouse; UniProt, Q3UPL0); Gg, *Gallus gallus* (chicken; Q5F3X8); Pb, *Python bivittatus* (snake; NCBI, XP\_007428791.1); Xt, *Xenopus tropicalis* (frog; UniProt, F6UZ63); Dr, *Danio rerio* (zebra fish; UniProt, Q7SYD5); Dm, *Drosophila melanogaster* (fly; UniProt, A1Z7J7); Ce, *Caenorhabditis elegans* (nematode; NCBI, NP\_502144.1); Sc, *Saccharomyces cerevisiae* (budding yeast; UniProt, P38968).

**Table S1.** Data collection, processing and refinement statistics.

| des3-20ALG-2/Sec31A Peptide Zn <sup>2+</sup> -Bound     |                         |
|---------------------------------------------------------|-------------------------|
| PDB Code                                                | 3WXA                    |
| Data Collection                                         |                         |
| Beamline                                                | PF-AR NE3A              |
| Wavelength (Å)                                          | 1.2821                  |
| Space group                                             | <i>P</i> 6 <sub>4</sub> |
| a/b/c (Å)                                               | 82.0/82.0/103.2         |
| α/β/γ (°)                                               | 90.0/90.0/120.0         |
| Resolution (Å)                                          | 71.0–2.36 (2.40–2.36)   |
| Measured reflections                                    | 166,054                 |
| Unique reflections                                      | 16,160                  |
| Completeness (%)                                        | 99.4 (99.3)             |
| <i>R</i> <sub>merge</sub>                               | 8.0 (25.7)              |
| I/σ                                                     | 32.2 (10.8)             |
| Refinement                                              |                         |
| <i>R</i> <sub>work</sub> / <i>R</i> <sub>free</sub> (%) | 21.8/29.6               |
| RMSD bond length (Å)                                    | 0.014                   |
| RMSD bond angle (°)                                     | 1.718                   |
| Average B-factor (Å <sup>2</sup> )                      | 44.0                    |
| No. ALG-2 molecule                                      | 2                       |
| No. Sec31A peptide                                      | 2                       |

Values in parentheses are for the highest resolution shell. RMSD, root mean square deviation.
